# Supplementary material for: Nanoflower-like MoS2 anchored on electrospun carbon nanofiber-interpenetrated reduced graphene oxide as a microbial fuel cell anode achieving high power density
Source: Royal Society of Chemistry journal article supplement (doi:10.1039/d3ta01265d), 2023-01-01
Supplement: d3ta01265d1.pdf [file d3ta01265d1.pdf]

# **Nanoflower-like MoS<sub>2</sub> anchored on electrospun carbon nanofibers-interpenetrated reduced graphene oxide as microbial fuel cells anode achieving high power density**

Yuanfeng Liu,<sup>abc</sup> Tingli Ren,<sup>abc</sup> Zijing Su,<sup>abc</sup> Congju Li<sup>\*abc</sup>

- a. School of Energy and Environmental Engineering, University of Science and Technology Beijing, Beijing 100083, China;
- b. Beijing Key Laboratory of Resource-oriented Treatment of Industrial pollutants, Beijing 100083, China;
- c. Energy Conservation and Environmental Protection Engineering Research Center in Universities of Beijing, Beijing 100083, China.

\* Corresponding author: congjuli@126.com

## Calculation methods

### Equation S1:

(1) The specific capacitance ( $C_p$ ) values were calculated by the following equation:

$$C_p = \frac{\int_{V_1}^{V_2} i \, dv}{2As(V_2 - V_1)} \quad (1)$$

Where  $V_1$  represented the initial potential,  $V_2$  was the final potential,  $i$  was the instantaneous current,  $A$  was the anode surface area ( $4.5 \text{ cm}^2$ ), and  $s$  represented the scan rate ( $\text{V s}^{-1}$ ).

### Equation S2:

(2) The COD removal efficiency in a batch mode were calculated as follows:

$$COD(\%) = \frac{(COD_{in} - COD_{out})}{COD_{in}} \times 100\% \quad (2)$$

Where  $COD_{in}$  and  $COD_{out}$  represented the inlet COD content and outlet COD content ( $\text{mg L}^{-1}$ ), respectively.

### Equation S3:

(3) The calculation formula of coulomb efficiency (CE) was as follows:

$$CE(\%) = \frac{M \int_0^t I \, dt}{FnV_{anode} \Delta COD} \quad (3)$$

Where  $M$  was the relative molecular weight of oxygen ( $32 \text{ g mol}^{-1}$ );  $I$  was output current;  $t$  was the working time in a batch.  $F$  was the Faraday constant ( $96485 \text{ C mol}^{-1}$ );  $n$  was the number of electrons transferred by oxidizing 1 mol organic substance with

oxygen as standard ( $4 \text{ mol}^- \cdot \text{mol}^-^{-1}$ );  $V_{anodic}$  was the anode chamber volume (0.118 L);  $\Delta COD$  was removal content of the organic substance ( $\text{mg L}^{-1}$ ) in one batch.

**Table S1. The composition of the analyte.**

| Samples                | Components                          | Contents (L <sup>-1</sup> ) | Purity | Source                     |
|------------------------|-------------------------------------|-----------------------------|--------|----------------------------|
| Acetate- growth medium | NaAc                                | 0.5 g                       | ≥98%   | Sigma-Aldrich              |
|                        | NH <sub>4</sub> Cl                  | 0.1 g                       | ≥99%   | Macklin                    |
|                        | NaCl                                | 0.5 g                       | ≥99%   | Hopebio                    |
|                        | NaHCO <sub>3</sub>                  | 1 g                         | ≥99%   | Sinopharm Chemical Reagent |
|                        | KH <sub>2</sub> PO <sub>4</sub>     | 0.53 g                      | ≥99%   | Macklin                    |
|                        | Na <sub>2</sub> HPO <sub>4</sub>    | 3.3 g                       | ≥99%   | Macklin                    |
|                        | HCl (25%)                           | 10 mL                       | 37%    | Sinopharm Chemical Reagent |
| Trace element (2 mL)   | FeCl <sub>3</sub> 4H <sub>2</sub> O | 1.5 g                       | ≥98%   | Sigma-Aldrich              |
|                        | ZnCl <sub>2</sub>                   | 0.07 g                      | ≥99%   | Sigma-Aldrich              |
|                        | MnCl <sub>4</sub> 4H <sub>2</sub> O | 0.1 g                       | ≥99%   | Sigma-Aldrich              |
|                        | CoCl <sub>2</sub> 6H <sub>2</sub> O | 0.19 g                      | 98%    | Sigma-Aldrich              |

|                         |                                       |        |      |                 |
|-------------------------|---------------------------------------|--------|------|-----------------|
|                         | CuCl <sub>2</sub> · 2H <sub>2</sub> O | 2 mg   | ≥99% | Sigma-Aldrich   |
|                         | NiCl <sub>2</sub> · 6H <sub>2</sub> O | 0.02 g | ≥98% | Sigma-Aldrich   |
|                         | NaMoO <sub>4</sub> · H <sub>2</sub> O | 0.04 g | ≥99% | Sigma-Aldrich   |
|                         | Biotin                                | 20 mg  | ≥98% | Sigma-Aldrich   |
|                         | Folic acid                            | 20 mg  | ≥98% | Sigma-Aldrich   |
|                         | Pyridoxine-HCl                        | 100 mg | ≥98% | Sigma-Aldrich   |
|                         | Thiamine-HCl · 2H <sub>2</sub> O      | 50 mg  | ≥99% | Sigma-Aldrich   |
| vitamin solution (2 mL) | Riboflavin                            | 50 mg  | 100% | Santa cruz      |
|                         | Nicotinic acid                        | 50 mg  | ≥99% | Absin           |
|                         | D-Ca-pantothenate                     | 50 mg  | ≥98% | Sigma-Aldrich   |
|                         | Vitamin B12                           | 50 mg  | ≥99% | Cayman chemical |
|                         | Para-aminobenzoic acid                | 50 mg  | ≥99% | Sigma-Aldrich   |
|                         | Thioctic acid                         | 50 mg  | ≥98% | Raybiotech      |

---

|                    |       |      |                 |
|--------------------|-------|------|-----------------|
| Nicotinamide       | 50 mg | ≥98% | Absin           |
| Lipoic acid        | 50 mg | ≥98% | Sigma-Aldrich   |
| Hemin              | 50 mg | ≥90% | Sigma-Aldrich   |
| 1,2-Nnphthoquinone | 50 mg | ≥99% | Sigma-Aldrich   |
| Vitamin K2         | 50 mg | ≥98% | Cayman chemical |

---

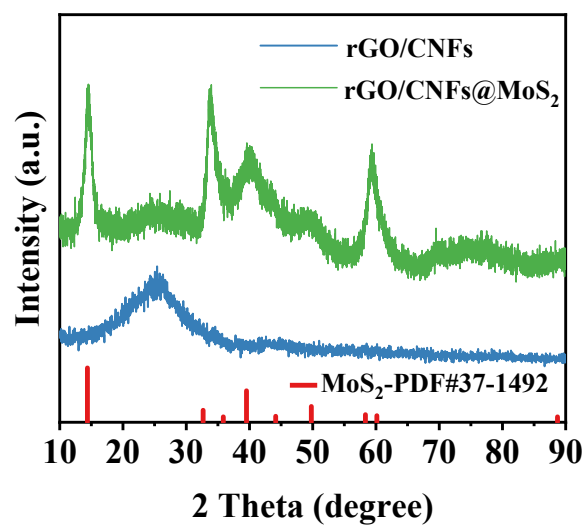

Fig. S1. XRD patterns of the prepared samples.

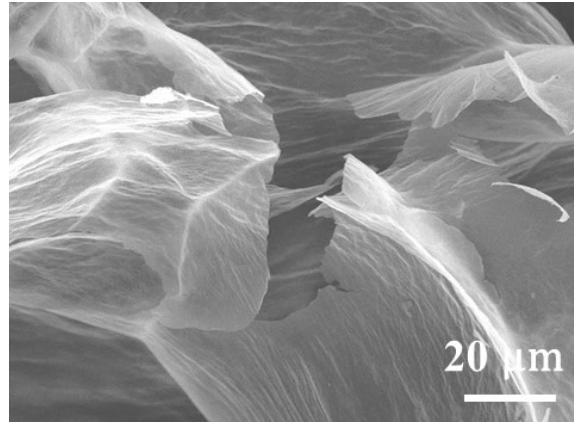

**Fig. S2. SEM images of the rGO layers.**



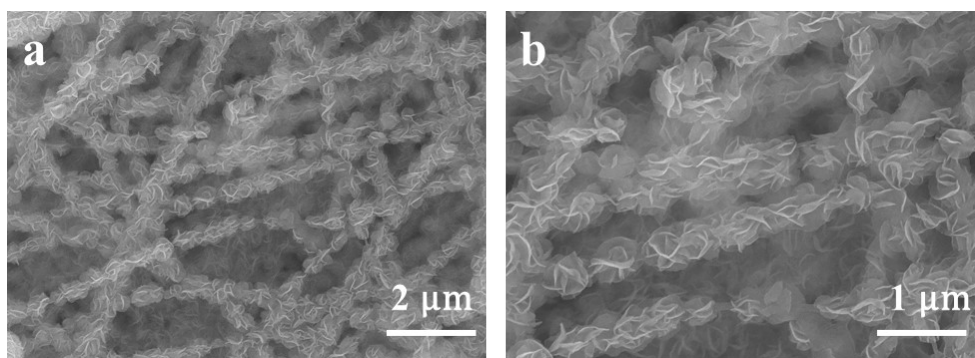

**Fig. S3. SEM images of (a) the CNFs@MoS<sub>2</sub> electrocatalyst and (b) its magnification.**

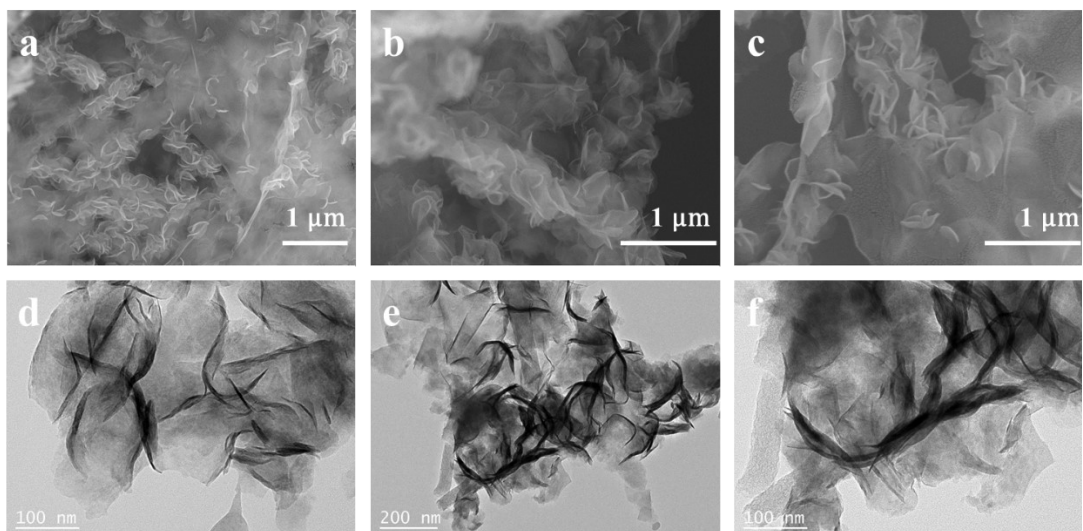

**Fig. S4.** SEM images of (a-c) the rGO/CNFs@MoS<sub>2</sub> electrocatalysts. TEM images of (d-f) the rGO/CNFs@MoS<sub>2</sub> electrocatalysts.

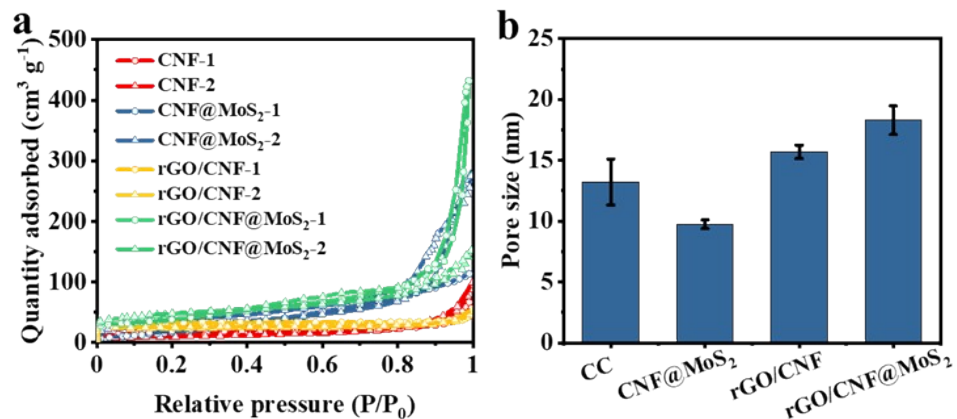

Fig. S5. (a) Nitrogen adsorption–desorption isotherms. (b) BJH pore size distributions.

Table S2. BET surface areas of different electrocatalysts.

| Sample                   | Surface area (cm <sup>3</sup> g <sup>-1</sup> ) | Average value<br>(cm <sup>3</sup> g <sup>-1</sup> ) | Standard<br>deviation |
|--------------------------|-------------------------------------------------|-----------------------------------------------------|-----------------------|
| CNF                      | 49.8                                            | 43                                                  | 6.7                   |
|                          | 36.2                                            |                                                     |                       |
| CNF@MoS <sub>2</sub>     | 72.4                                            | 76.4                                                | 4                     |
|                          | 80.4                                            |                                                     |                       |
| rGO/CNF                  | 129.8                                           | 116.6                                               | 13.2                  |
|                          | 103.4                                           |                                                     |                       |
| rGO/CNF@MoS <sub>2</sub> | 142.8                                           | 150.5                                               | 7.7                   |
|                          | 158.8                                           |                                                     |                       |

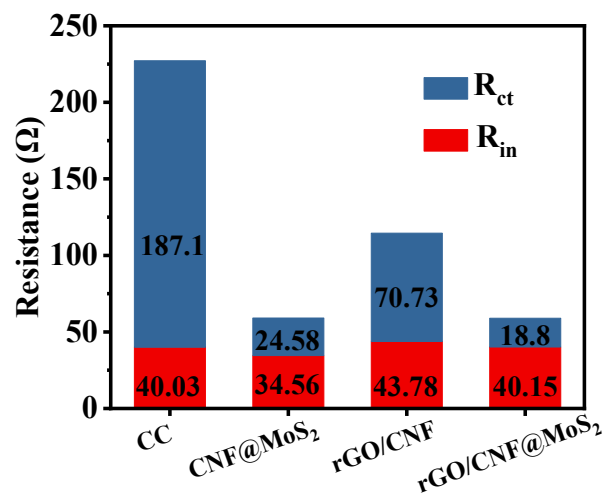

Fig. S6. The fitted resistance values of different anodes.

**Table S3. Comparison of the MFC power density.**

| <b>Anode</b>                          | <b>Inoculum</b>               | <b>MFC type</b>       | <b>Power density<br/>(mW m<sup>-2</sup>)</b> |
|---------------------------------------|-------------------------------|-----------------------|----------------------------------------------|
| HP-CNFs <sup>1</sup>                  | <i>S.Putrefaciens</i> CN32    | Dual-chamber, 150 mL  | 1407.42                                      |
| N-MWCNT/GA <sup>2</sup>               | <i>Shewanella oneidensis</i>  | Dual-chamber, 130 mL  | 2977.8                                       |
| BL-PANI <sup>3</sup>                  | Wastewater                    | Dual-chamber, 28 mL   | 567.2                                        |
| PPy/NFs/PET <sup>4</sup>              | <i>Escherichia coli</i> (K12) | Dual-chamber, 500 mL  | 2420                                         |
| FeCo/NCNTs@CF <sup>5</sup>            | Wastewater                    | Dual-chamber, 100 mL  | 3040                                         |
| NCP/LSC <sup>6</sup>                  | Anaerobic sludge              | Single-chamber, 28 mL | 1090                                         |
| rGO/CNFs@MoS <sub>2</sub> (This work) | Wastewater                    | Dual-chamber, 118 mL  | 3548                                         |

**Note:** HP-CNFs: Hierarchically porous carbon nanofibers; N-MWCNT/GA: Nitrogen-doped multiwalled carbon nanotube/graphene; PPy/NFs/PET: polypyrrole/poly(vinyl alcohol-co-polyethylene) nanofibers/poly(ethylene terephthalate); NCP/LSC: Nitrogen enriched PANI/loofah sponge carbon

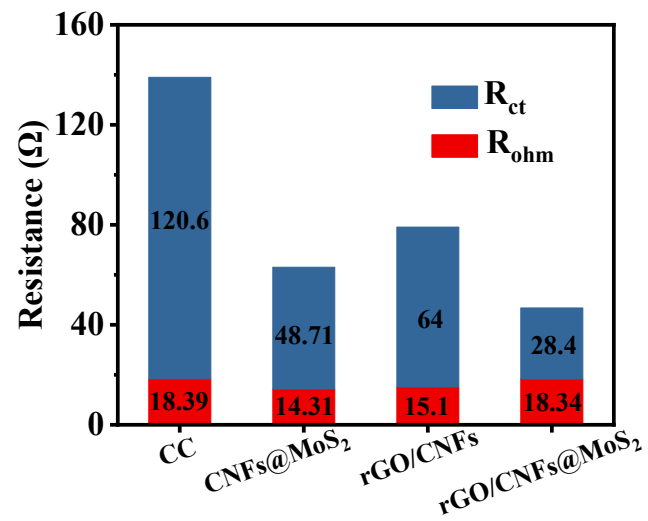

Fig. S7. The fitted resistance values of different bioanodes under turnovers.

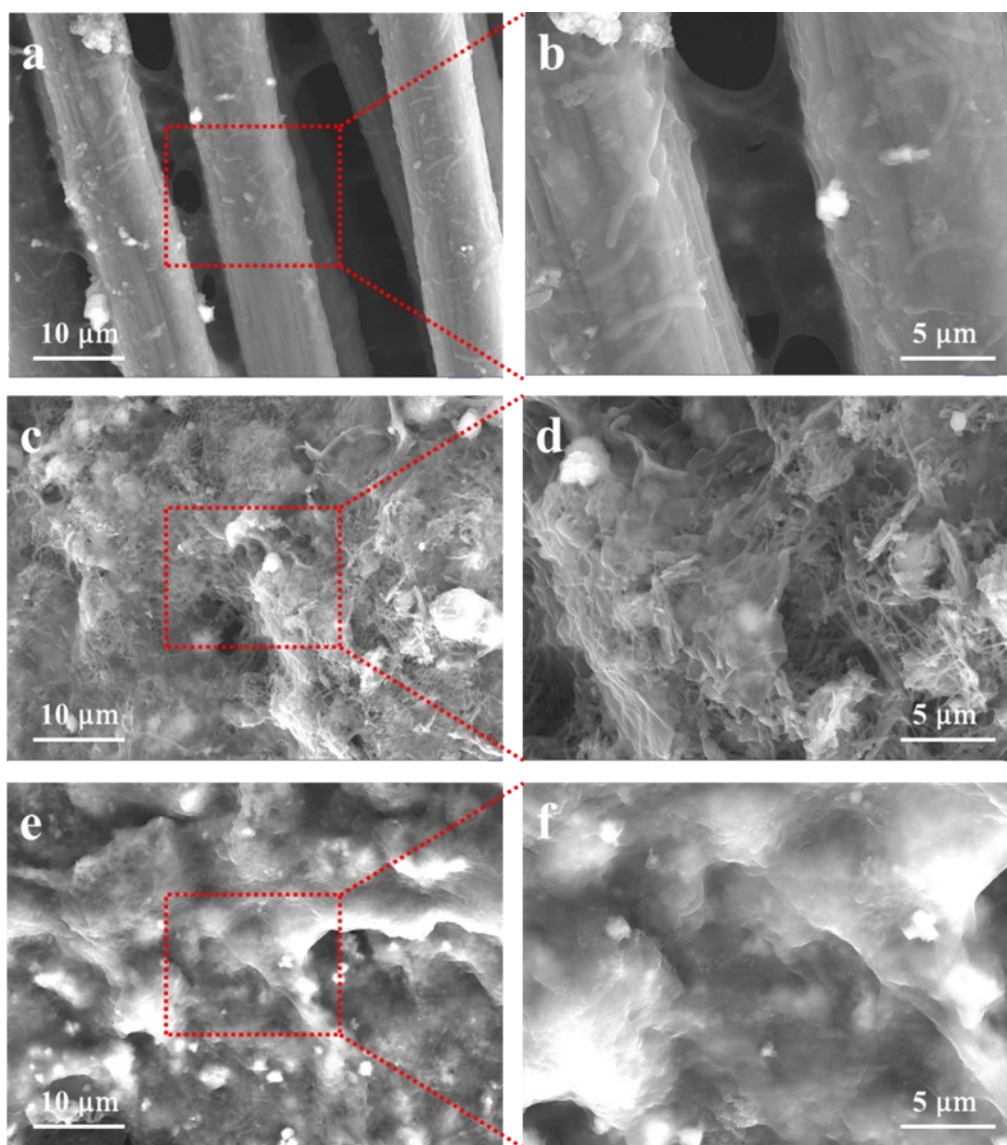

**Fig. S8.** SEM images of the biofilms grown on the (a, b) CC, (c, d) rGO/CNFs, and (e, f)

rGO/CNFs@MoS<sub>2</sub>

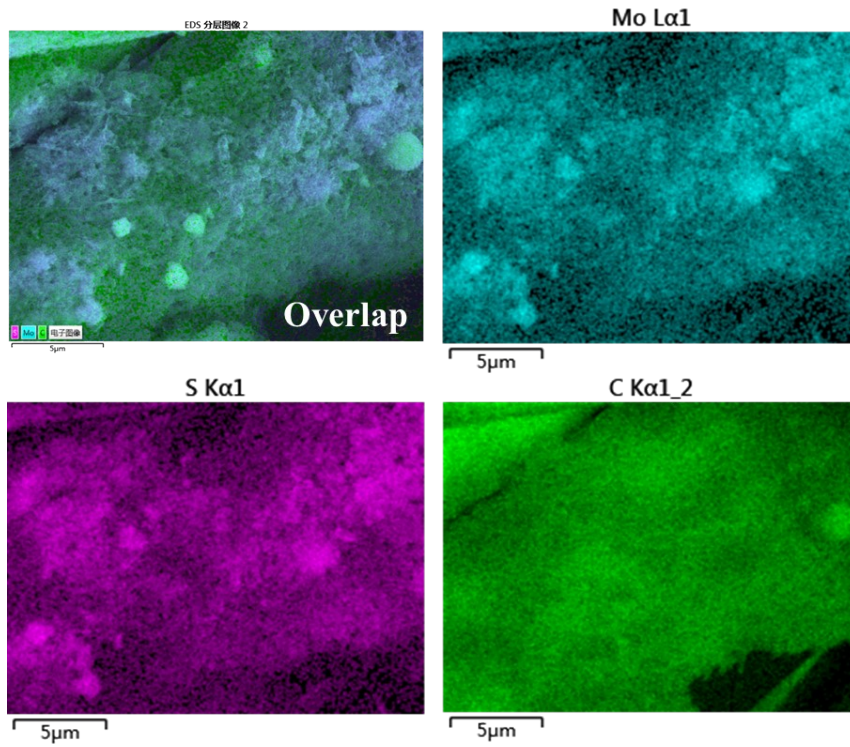

**Fig. S9.** EDX elemental maps of the biofilm with the CNF@MoS<sub>2</sub> electrocatalysts.



At the end of the experiment, we further performed the XPS analysis to examine the electronic structures of Mo and S elements in the biofilms. As shown in Fig. S10, the high-resolution Mo 3d XPS spectrum exhibited two spin-orbital doublet peaks at 229.4 eV and 232.6 eV, which can be assigned to Mo<sup>4+</sup>. Additionally, a weak peak at the binding energy of 236 eV was related to Mo<sup>6+</sup>, implying the presence of Mo<sup>4+</sup> and Mo<sup>6+</sup> in the biofilm. The existence of multiple valance states of the Mo element in the biofilms is conducive to mediating the interspecific electron transfer and information exchange process, thus improving the power generation of MFC.<sup>7</sup> The high-resolution S 2p XPS spectrum suggested the existence of divalent sulfide ions (S<sup>2-</sup>) in the biofilms. Wang et al.<sup>8</sup> reported that elemental sulfur can serve as electron shuttles to mediate electron-shuttling during bacterial colonization. Based on the above analysis, the Mo and S species embedded in the biofilms were favorable for EET.

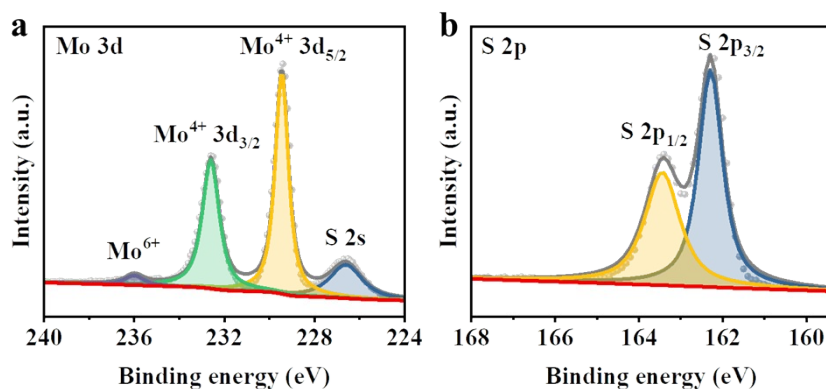

**Fig. S10.** The high-resolution XPS analysis of (a) Mo 3d, and (b) S 2p.

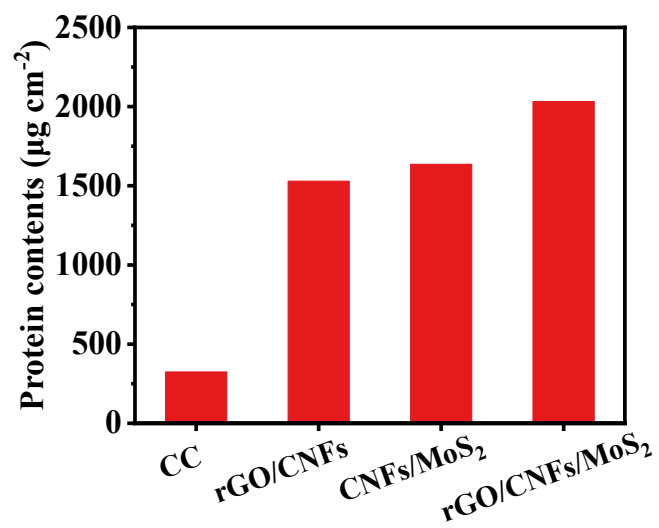

Fig. S11. The protein contents on different anodes.

**Table S4.** Diversity and abundance index of the microbial community on different anodes.

| <b>Samples</b>            | <b>Shannon<sup>a</sup></b> | <b>Simpson<sup>b</sup></b> | <b>Coverage</b> | <b>ACE<sup>c</sup></b> | <b>Chao<sup>c</sup></b> | <b>OTUs</b> | <b>Sequence</b> |
|---------------------------|----------------------------|----------------------------|-----------------|------------------------|-------------------------|-------------|-----------------|
| CC                        | 4.01                       | 0.058                      | 0.998           | 487.3                  | 468.5                   | 640         | 48144           |
| CNFs@MoS <sub>2</sub>     | 4.19                       | 0.045                      | 0.998           | 569.5                  | 564.8                   | 769         | 53161           |
| rGO/CNFs                  | 4.5                        | 0.025                      | 0.999           | 492.4                  | 484.3                   | 751         | 50731           |
| rGO/CNFs@MoS <sub>2</sub> | 4.63                       | 0.023                      | 0.999           | 570.9                  | 578.9                   | 859         | 65150           |

<sup>a</sup> The diversity index of the microbial community. A higher value indicates more diversity.

<sup>b</sup> The evenness index of the microbial community. A higher value indicates more evenness.

<sup>c</sup> The abundance index of the microbial community. A higher value indicates more abundance.

Fig. S12 presented multiple sets of experimental data toward the current density, power density and polarization curves of MFC, demonstrating the negligible deviation among the different data. Thus, intermediate values of power density and current density are adopted in the manuscript for normal analysis.

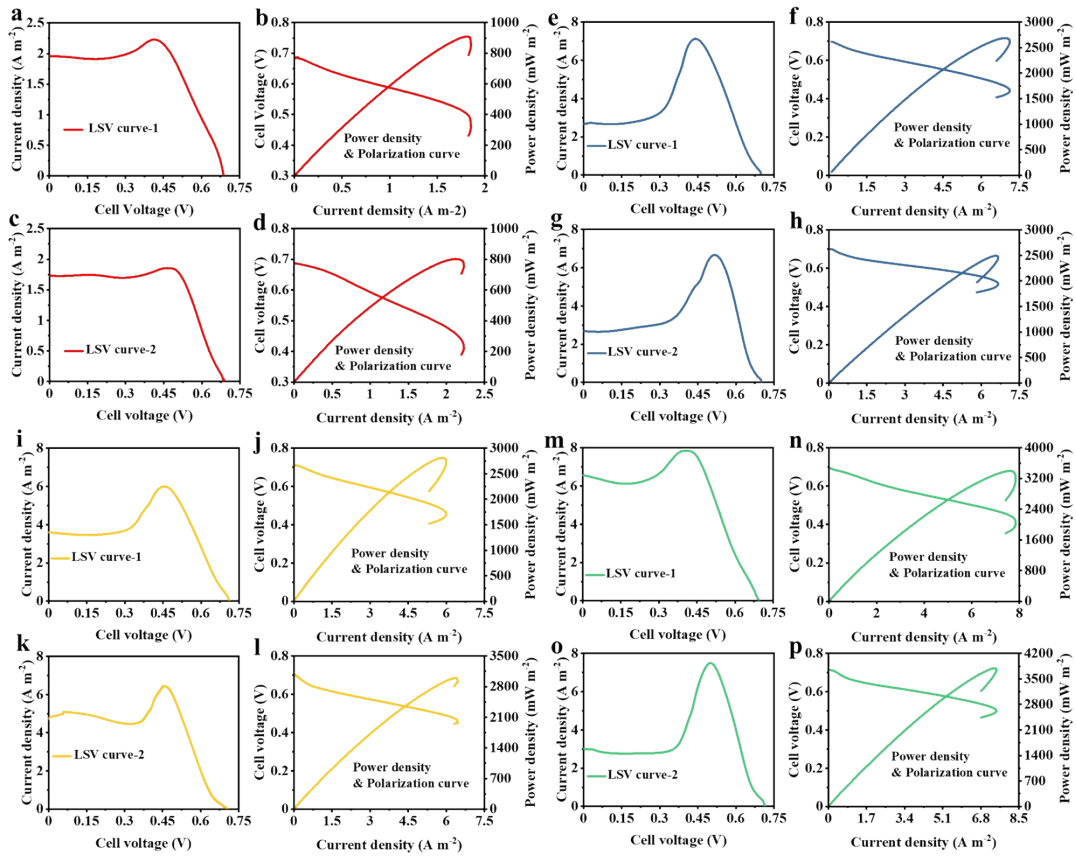

**Fig. S12.** MFC performance with different anodes (a-d) CC, (e-h) CNF@MoS<sub>2</sub>, (i-k)

rGO/CNF, (m-p) rGO/CNF@MoS<sub>2</sub>

**Table S5. Multiple sets of experimental data toward current density and power density.**

| Sample                   | Current density (A m <sup>-2</sup> ) | Power density (mW m <sup>-2</sup> ) | Mid-value |
|--------------------------|--------------------------------------|-------------------------------------|-----------|
|                          | 2.23                                 | 909                                 |           |
| CC                       | 2.61                                 | 805                                 | 805       |
|                          | 1.853                                | 802                                 |           |
|                          | 6.7                                  | 2493                                |           |
| CNF@MoS <sub>2</sub>     | 7.02                                 | 2560                                | 2560      |
|                          | 7.12                                 | 2685                                |           |
|                          | 6.0                                  | 2809                                |           |
| rGO/CNF                  | 6.8                                  | 2992                                | 2992      |
|                          | 6.4                                  | 2999                                |           |
|                          | 77.84                                | 3396                                |           |
| rGO/CNF@MoS <sub>2</sub> | 8.49                                 | 3584                                | 3584      |
|                          | 7.49                                 | 3789                                |           |

## Reference

1. S. Qian, X. Wu, Z. Shi, X. Li, X. Sun, Y. Ma, W. Sun, C. Guo and C. Li, *Nano Research*, 2022, **15**, 5089-5097.
2. S. Jin, Y. Feng, J. Jia, F. Zhao, Z. Wu, P. Long, F. Li, H. Yu, C. Yang and Q. Liu, *Energy & Environmental Materials*, 2022, **0**, 1-9.
3. W. Zhang, B. Xie, L. Yang, D. Liang, Y. Zhu and H. Liu, *Bioresource technology*, 2017, **233**, 291-295.
4. Y. Tao, Q. Liu, J. Chen, B. Wang, Y. Wang, K. Liu, M. Li, H. Jiang, Z. Lu and D. Wang, *Environmental science & technology*, 2016, **50**, 7889-7895.
5. Y. Wang, X. Cheng, K. Liu, X. Dai, J. Qi, Z. Ma, Y. Qiu and S. Liu, *ACS Applied Materials & Interfaces*, 2022, **14**, 35809-35821.
6. Y. Yuan, S. Zhou, Y. Liu and J. Tang, *Environmental science & technology*, 2013, **47**, 14525-14532.
7. X. Li, M. Hu, L. Zeng, J. Xiong, B. Tang, Z. Hu, L. Xing, Q. Huang and W. Li, *Biosensors and Bioelectronics*, 2019, **145**, 111727-111734.
8. R. Wang, M. Yan, H. Li, L. Zhang, B. Peng, J. Sun, D. Liu and S. Liu, *Advanced Materials*, 2018, **30**, 1800618-1800624.
